# Supplementary material for: Protective Role of a TMPRSS2 Variant on Severe COVID-19 Outcome in Young Males and Elderly Women
Source: MDPI journal article supplement (doi:10.3390/genes12040596), 2021-04-19
Supplement: s1 [file s1]

**Supplementary table 6. Differential expression data for *TMPRSS2*.**

Data from Expression Atlas for *TMPRSS2* in Homo sapiens. Data related to sexual hormones were selected over 212 experiments.

| Experiment<br>accession | Comparison                                                                 | log <sub>2</sub><br>fold<br>change | Adjusted<br><i>p</i> -value |
|-------------------------|----------------------------------------------------------------------------|------------------------------------|-----------------------------|
| E-MTAB-5537             | 'estrogen receptor alpha shRNA' vs<br>'scrambled shRNA'                    | -6.7                               | 5.52E-37                    |
| E-MTAB-7294             | 'Enzalutamide, 1 micromolar' vs<br>'vehicle' at '48 hour'                  | -3                                 | 3.37E-99                    |
| E-MTAB-7294             | 'Enzalutamide, 1 micromolar' vs<br>'vehicle' at '24 hour'                  | -2.6                               | 9.90E-130                   |
| E-GEOD-48403            | 'after androgen ablation therapy' vs 'before<br>androgen ablation therapy' | -2.2                               | 2.01E-13                    |
| E-GEOD-11428            | 'abl; dihydrotestosterone; 4 hour' vs<br>'abl; vehicle'                    | 1.5                                | 3.35E-06                    |
| E-GEOD-11791            | '17beta-estradiol; 100 nanomolar; wild type' vs<br>'ethanol; wild type'    | -1.5                               | 0.000118                    |
| E-GEOD-57935            | 'estradiol; 1 nanomolar' vs<br>'vehicle' in 'control' at '24 hour'         | -1.4                               | 7.99E-05                    |
| E-GEOD-42619            | 'E2; 10 nanomolar' vs<br>'control; E2 '                                    | -1.1                               | 0.027774                    |
